# Supplementary material for: Biorefining of perennial ryegrass for the production of nanofibrillated cellulose
Source: Royal Society of Chemistry journal article supplement (doi:10.1039/c2ra20716h), 2012-01-01
Supplement: c2ra20716h.zip [file c2ra20716h.zip]

## Sheet: Scaled up treatment costs
All treatments begin processing with 1000kg fresh grass.
Weights Used are Dry Weights
				Energy Cost		Chemical Cost					Water Used	Water Cost	Total Cost
	Starting weight	Concentration	Yield	Time Used	Energy Used	Unit Quantity	Unit Cost	Concentration	Quantity Used	Cost
Treatment Step	kg		kg	min	kWh	kg, l	£		kg, l	£	Litre	£	£
Treatment A
Screw Press	229.7		157.01	1118	500.1						30
Fibre Extraction (Blender)	157.06		113.15	942.34	7.85						785.29
Mill	113.15		105.98	11000.6	77.79
NaOH Pretreatment	105.98	10%w/v	47.72	127178	190.78*	25	24.19	2 M	84.79	82.04	1059.81
Vacuum Pump				111281	114.66ψ						21196.4
Turrax	47.72	1%w/v	43.82	190880	381.76*						4772	41.77¥
				442400	1272.94					82.04			£218.64 (43.82 kg)
					£94.83#
Treatment B
Screw Press	229.7		157.01	1118	500.1						30
Fibre Extraction (Blender)	157.06	25%w/v	113.15	942.34	7.85						785.29
Mill	113.15		105.98	11000.6	77.79
NaOH Pretreatment	105.98	10%w/v	47.72	127178	190.78*	25	24.19	2 M	84.79	82.04	1059.81
Vacuum Pump				111281	114.66ψ						21196.4
Turrax	47.72	1%w/v	43.82	190880	381.76*						4772
Microfluidiser	43.82	0.5%w/v	36.07	876400	21910.04Ŧ						8764.3	54.91¥
				1.3188e+06	23183					82.04			£1864.1 (36.07 kg)
					£1727.13#
Treatment C
Screw Press	229.7		157.01	1118	500.1						30
Fibre Extraction (Blender)	157.06	25%w/v	113.15	942.34	7.85						785.29
Mill	113.15		105.98	11000.6	77.79
NaOH Pretreatment	105.98	10%w/v	47.72	127178	190.78*	25	24.19	2 M	84.79	82.04	1059.81
Vacuum Pump				111281	114.66ψ						21196.4
HCl	47.72	1%w/v	25.61	9162240	13743.42*	200	380	0.1	477.2	906.68	4772
H2SO4						200	285	0.3	1431.6	2040.03
NaOH						25	24.19	0.055	1749.73	1693.04	31813.3
Vacuum Pump				182927	237.8ψ							89.49¥
				9.59669e+06	14872.4					4721.79			£5919.3 (25.61 kg)
					£1107.99#
Treatment D
Screw Press	229.7		157.01	1118	500.1						30
Fibre Extraction (Blender)	157.057		113.149	942.34	7.85						785.285
Mill	113.149		105.982	11000.6	77.79
EDTA	105.982	5%w/v	39.796	254357	529.99*	5	31.69	3 g/l	6.36	40.31	2119.64
Vacuum Pump					289.33ψ						42392.8
NaOH				254357	529.99*	25	24.19	0.5 M	42.39	41.02	2119.64
Vacuum Pump					289.33ψ						42392.8
NaOCl				254357	657.19*	25	50.04	0.01	211.96	424.26	2119.64
Vacuum Pump					289.33ψ						42392.8
HCl				254357	657.19*	200	380	2 M	429.86	816.73	2119.64
Vacuum Pump					289.33ψ						42392.8	268.3¥
				1.03049e+06	4114.42					1322.32			£ 1897.1 (39.8 kg)
					£306.52#
*Energy costs based on scaled up version of 0.5 l runs
ŦEnergy cost based on rate of 100 ml/min processed
ψEnergy cost based on rate of 200 ml/min passed
#Energy cost based on unit cost 7.45p/kWh electricity
¥Water cost based on average cost of £1.50 per cubic metre
Costs for producing 1kg product
Treatment	Energy £	Chemicals £	Water £	Total £	Time h
A	2.16	1.87	0.95	4.98	168.26
B	47.88	1.87	1.52	51.27	609.37
C	43.26	148.37	3.49	195.12	6245.4
D	7.7	33.22	6.74	47.66	431.53

## Sheet: Original treatment costs
								Chemicals					Water Used
Process	Starting Weight	Yield %	Equipment Used		Energy			Chemicals Used	Unit Quantity	Unit Cost	Quantity Used	Cost	In Solution	Washing
	(40.01kg fresh weight)				Time Used	Energy Consumed kWh			kg, l	£	g,ml	£
Screw Press	9.16kg	68.376	Screw Press	Loading	18 min	1.315								30 l
				Processing	44 min	8.162
Blender	500g	72.04	Blender			0.025							2 l	2 l
Mill	12g	93.67	Mill		70 s	0.00825
NaOH Pretreatment	10.0068g	45.03	Hotplate	Heating Up		0.06		NaOH	25 kg	24.19	8 g	0.0078	100 ml	2 l
				Running	60 min	0.09
			Vacuum Pump		10 min	0.013
Turrax	1.6875g	91.8222	Turrax		20 min	0.04							300 ml
Microfluidiser	2.695g	82.32	Microfluidiser	Set Up		0.04							600 ml	300 ml
				Processing	60 min	1.5
Conc HCl/H2SO4 Hydrolysis	3.0158g	53.667	Hotplate	Heating Up		0.06		HCl	200 l	380	30 ml	0.057	300 ml	2 l
				Running	16 h	1.44		H2SO4	200 l	285	90 ml	0.128
			Vacuum Pump		10 min	0.013		NaOH	25 kg	24.19	110 g	0.106
EDTA	5.0064g	37.55	Hotplate	Heating Up		0.08		EDTA	5 kg	31.69	0.3g	0.0019	100 ml	2 l
				Running	60 min	0.125
			Vacuum Pump		10 min	0.013
NaOH			Hotplate	Heating Up		0.08		NaOH	25 kg	24.19	2.0 g	0.0019	100 ml	2 l
				Running	60 min	0.125
			Vacuum Pump		10 min	0.013
NaOCl			Hotplate	Heating Up		0.1		NaOCl	25 l	50.04	10 ml	0.02	100 ml	2 l
				Running	60 min	0.155
			Vacuum Pump		10 min	0.013
HCl			Hotplate	Heating Up		0.1		HCl	200 l	380	20.27 ml	0.0385	100 ml	2 l
				Running	60 min	0.155
			Vacuum Pump		10 min	0.013
